# Supplementary material for: Enhanced electrostatic potential with high energy and power density of a symmetric and asymmetric solid-state supercapacitor of boron and nitrogen co-doped reduced graphene nanosheets for energy storage devices
Source: Royal Society of Chemistry journal article supplement (doi:10.1039/d1nj00486g), 2021-01-01

## Enhanced electrostatic potential with high energy and power density of Symmetric and Asymmetric Solid-State Supercapacitor of boron and nitrogen co-doped reduced graphene nanosheet for Energy storage device

P. Muthu Pandian, A. Pandurangan \*

Department of Chemistry, Anna University, Guindy campus, Chennai - 25, Tamil Nadu, India

\*Correspondence: pandurangan\_a@yahoo.com; Tel.: +91 44 22358653; fax: +91 44 22200660

**Figure S1.** AFM images of the graphene oxide at a lateral view with an appropriate measurements

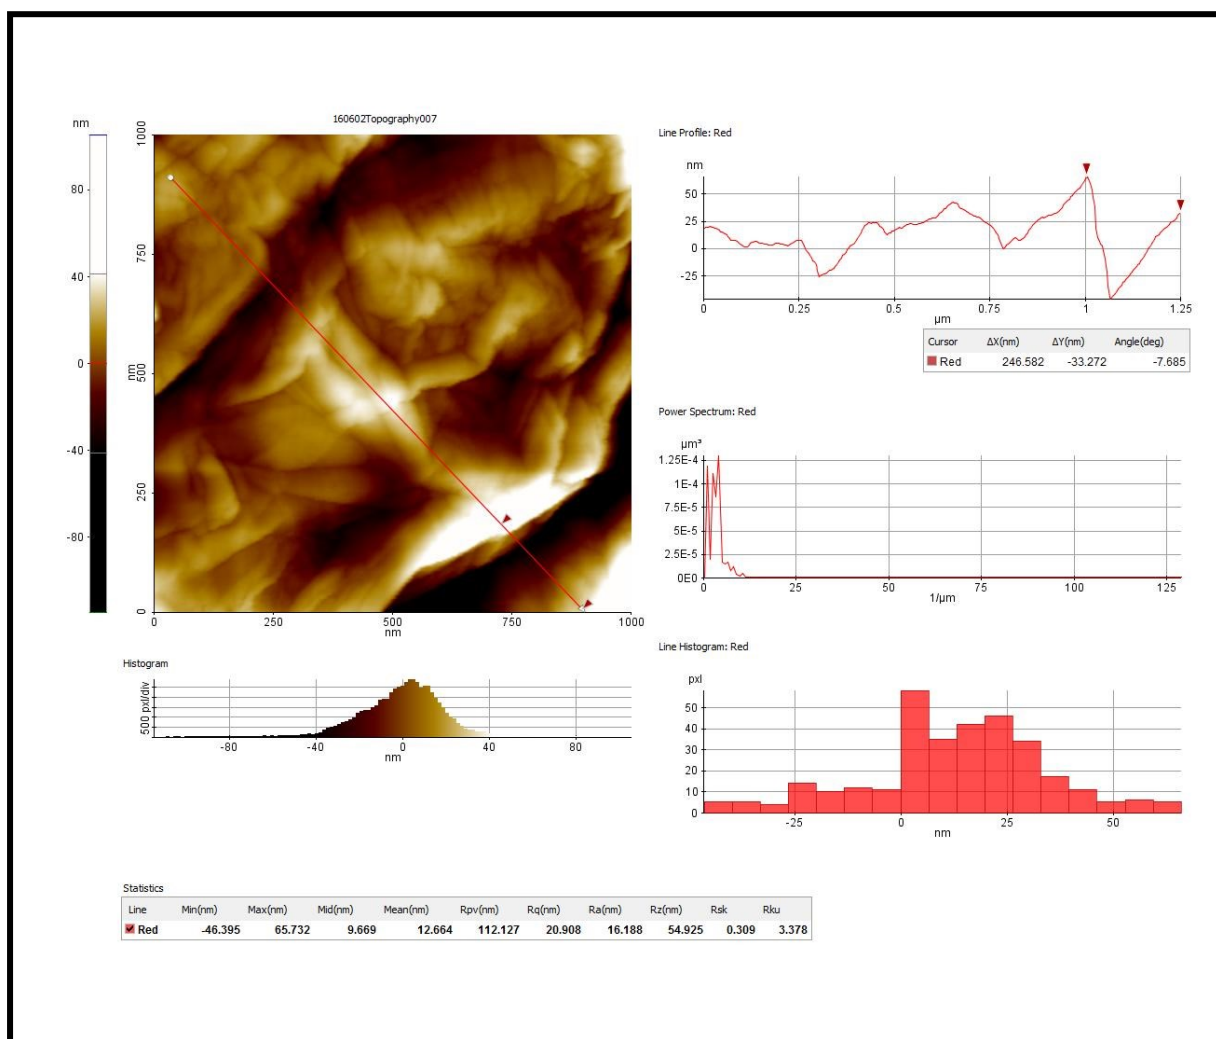

**Figure S2.** Elemental mapping of the BNUG1 at a magnification of 50  $\mu\text{m}$  shows the presence of boron, carbon, nitrogen and oxygen with the EDAX spectra.

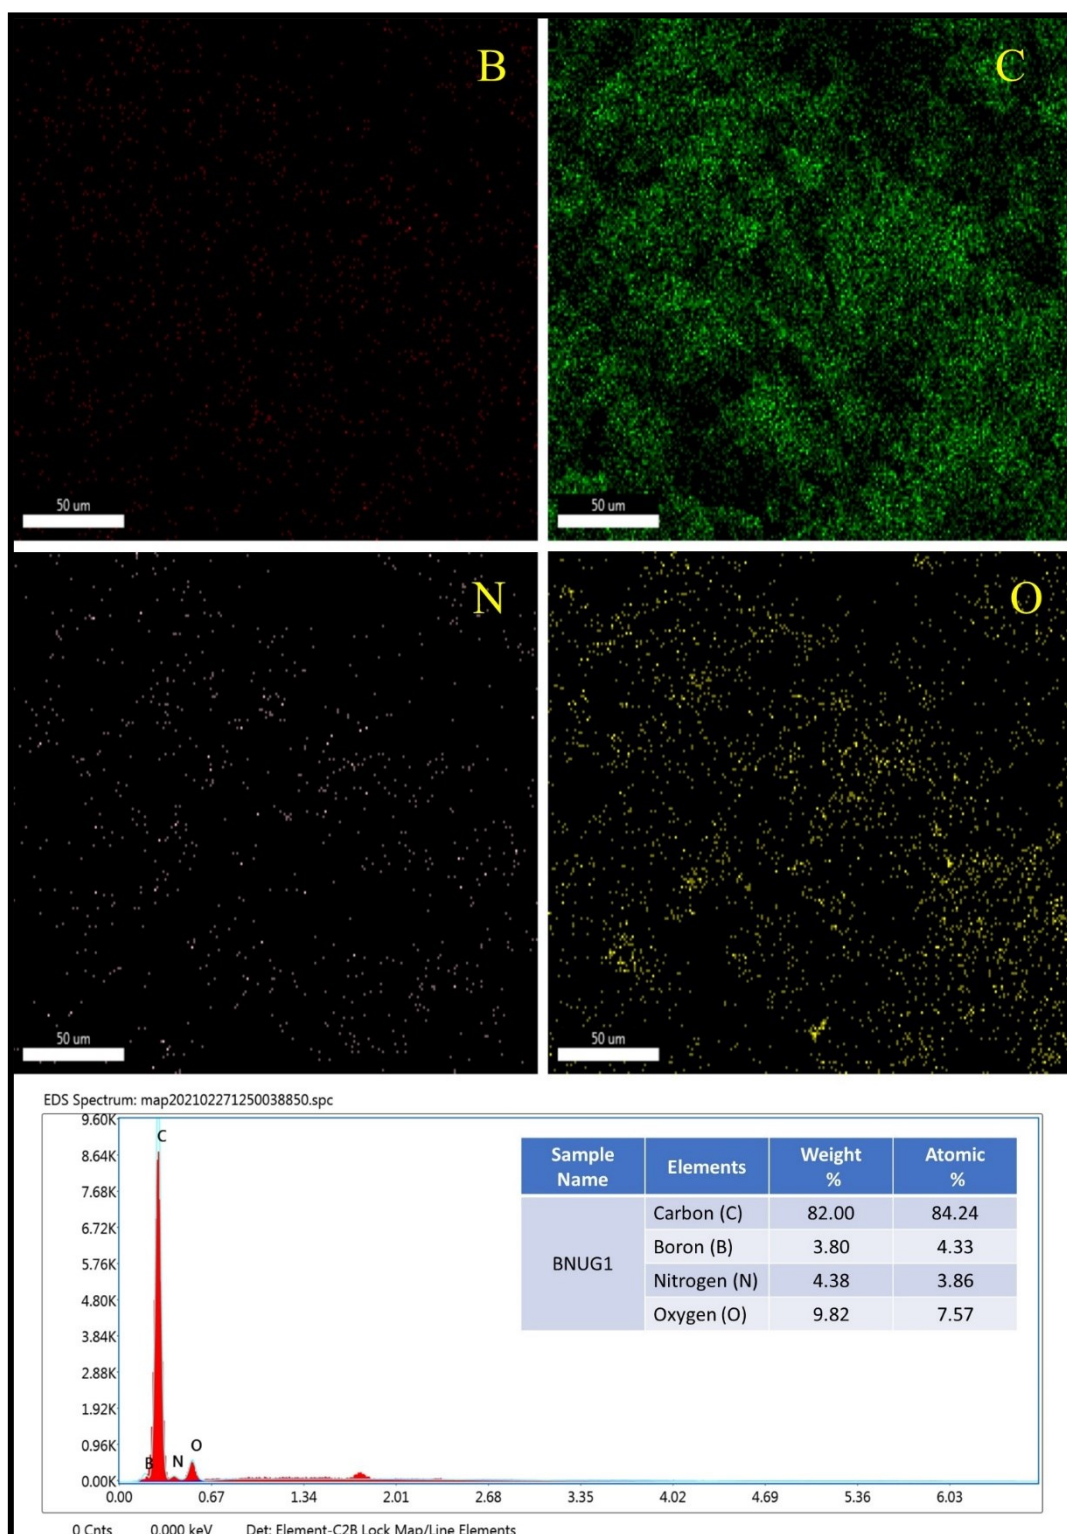

**Figure S3.** Elemental mapping of the BNUG2 at a magnification of 50  $\mu\text{m}$  shows the presence of boron, carbon, nitrogen and oxygen with the EDAX spectra.

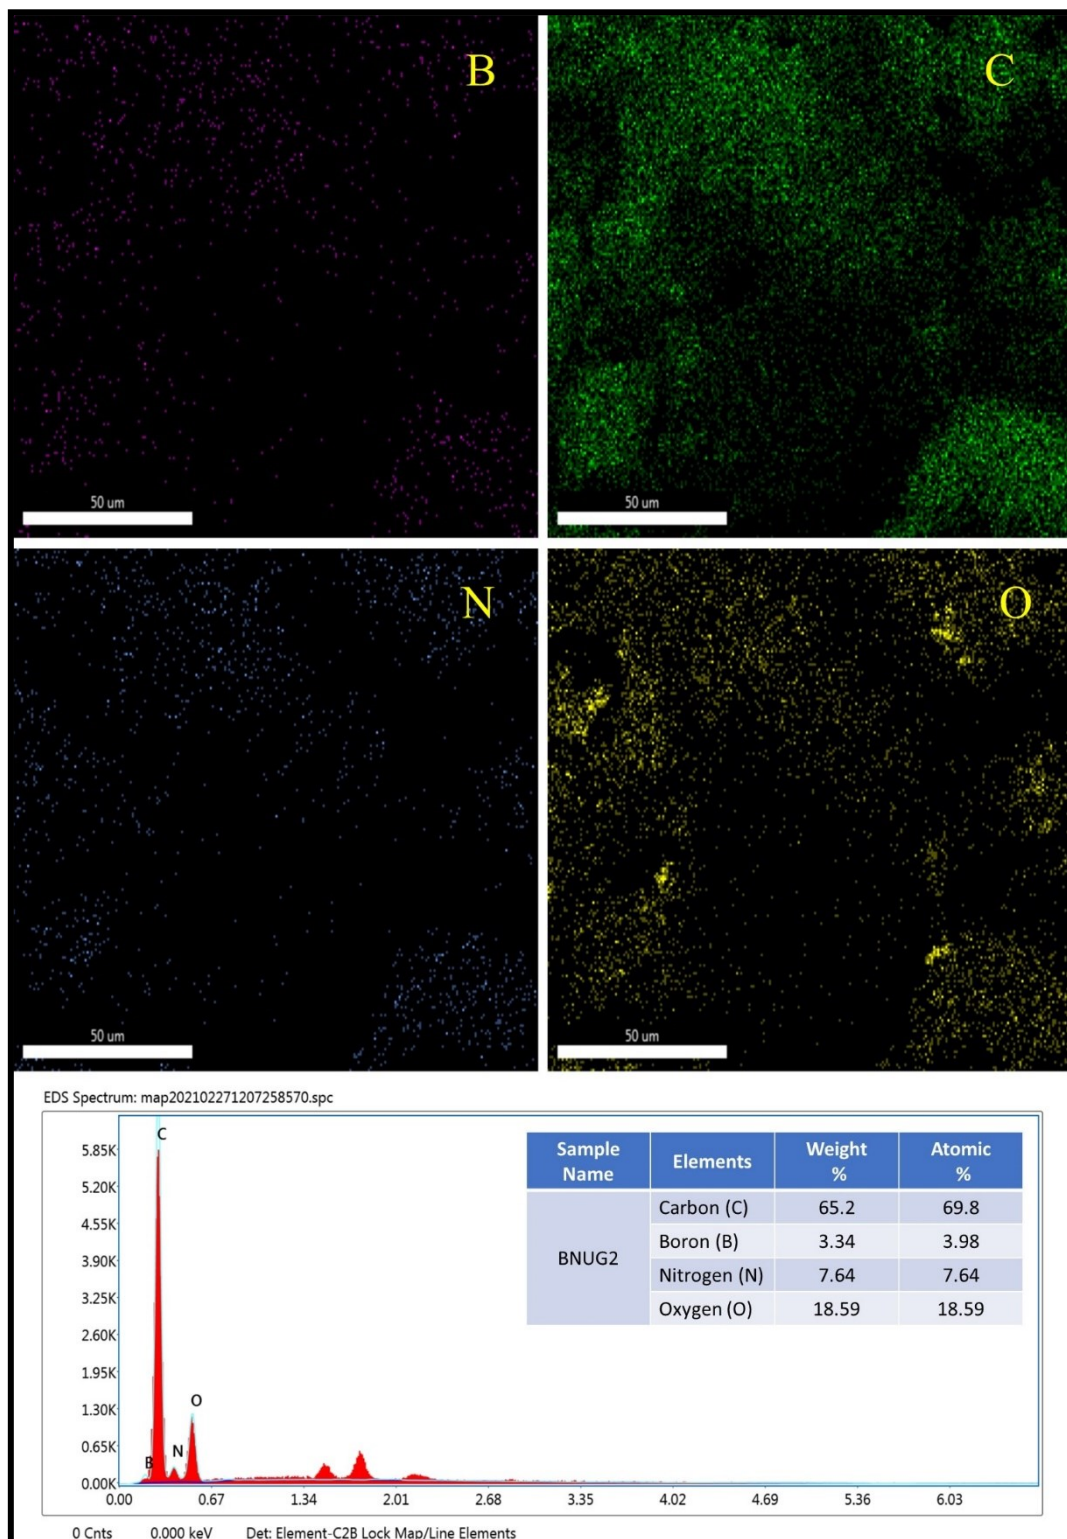

**Figure S4.** Elemental mapping of the BNUG3 at a magnification of 50  $\mu\text{m}$  shows the presence of boron, carbon, nitrogen and oxygen with the EDAX spectra.

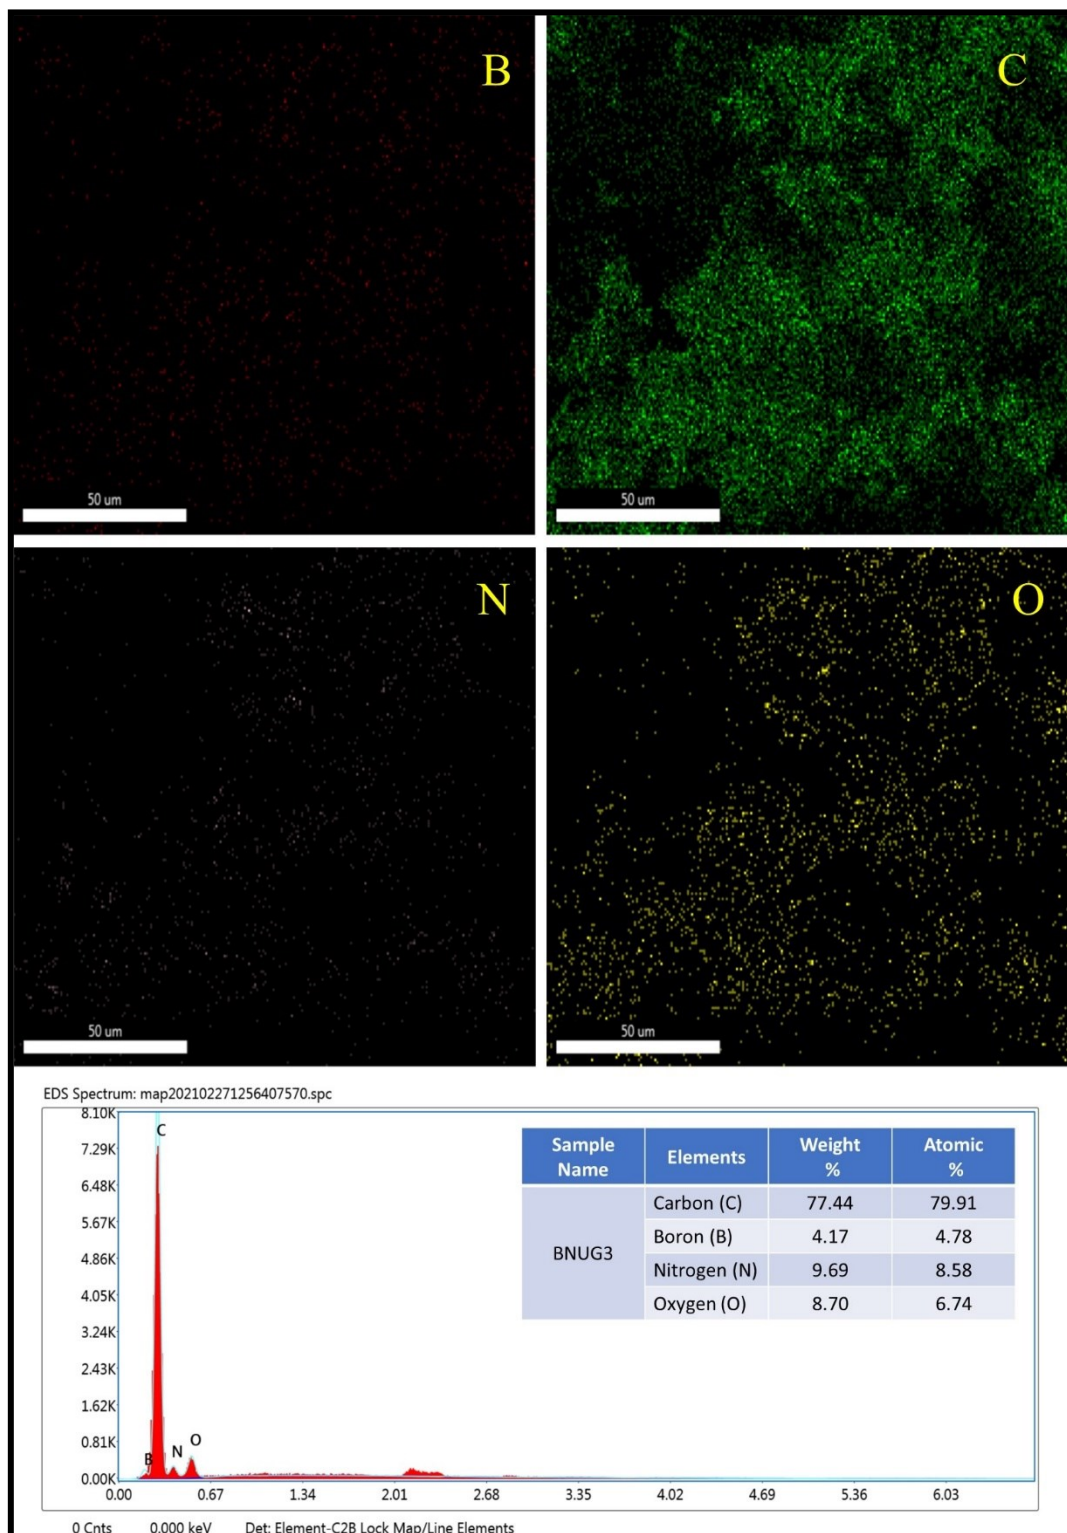

**Figure S5.** Elemental mapping of the BNUG4 at a magnification of 50  $\mu\text{m}$  shows the presence of boron, carbon, nitrogen and oxygen with the EDAX spectra.

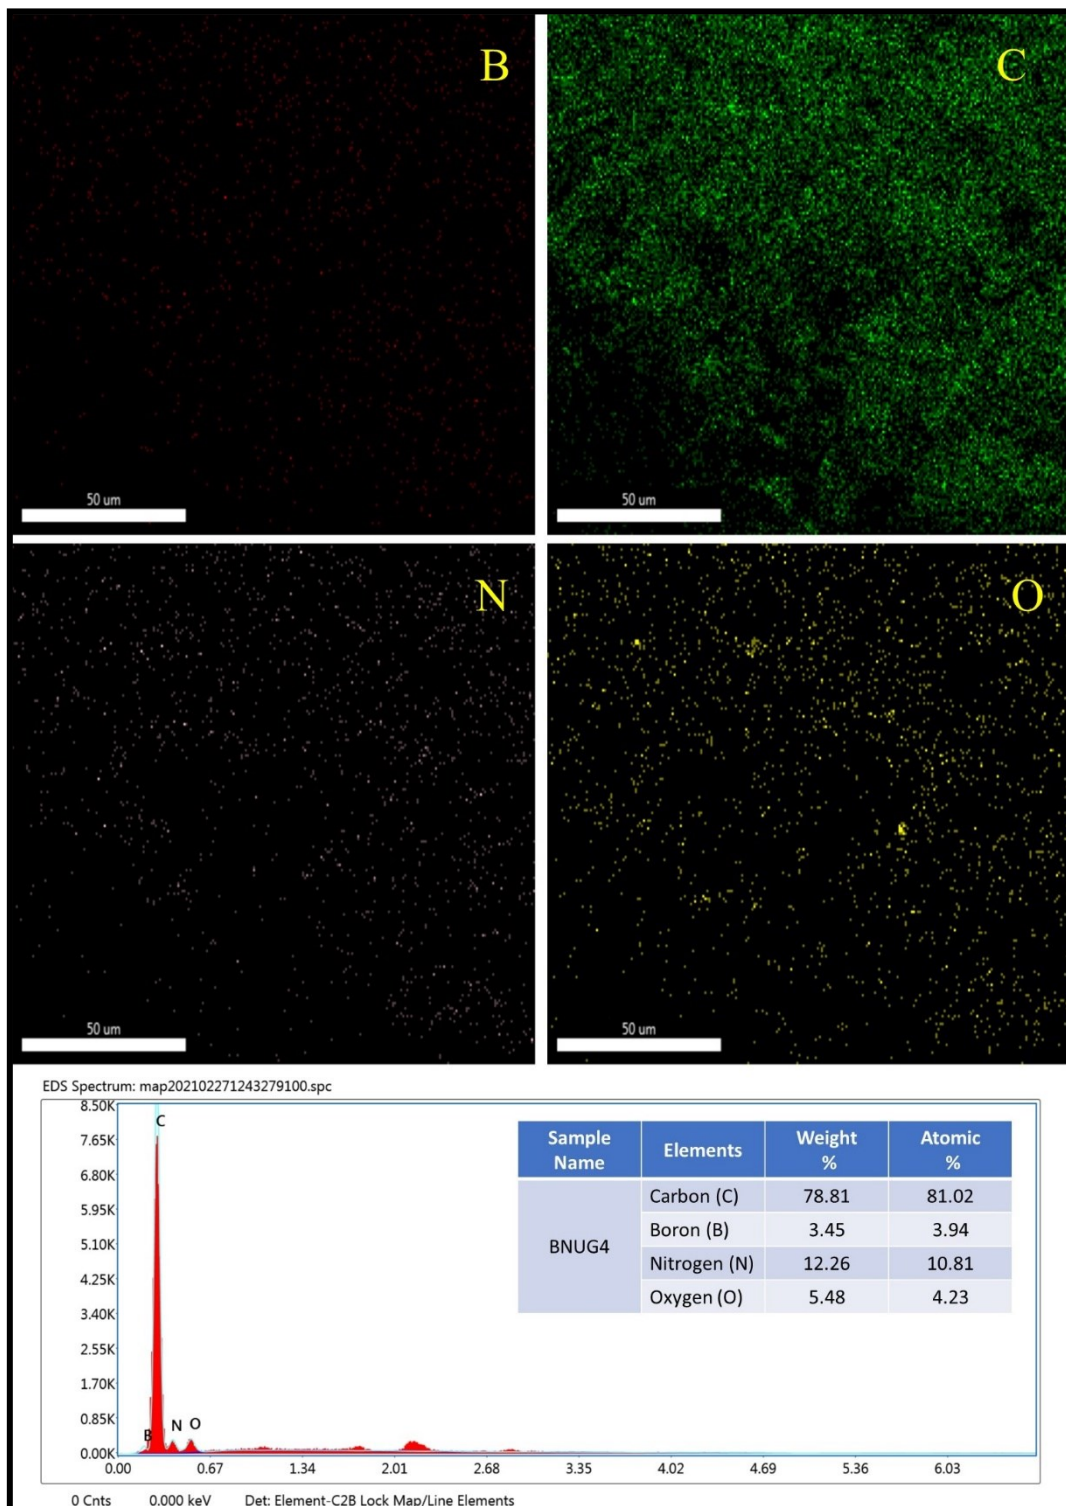

**Figure S6.** Elemental mapping of the BNUG5 at a magnification of 50  $\mu\text{m}$  shows the presence of boron, carbon, nitrogen and oxygen with the EDAX spectra.

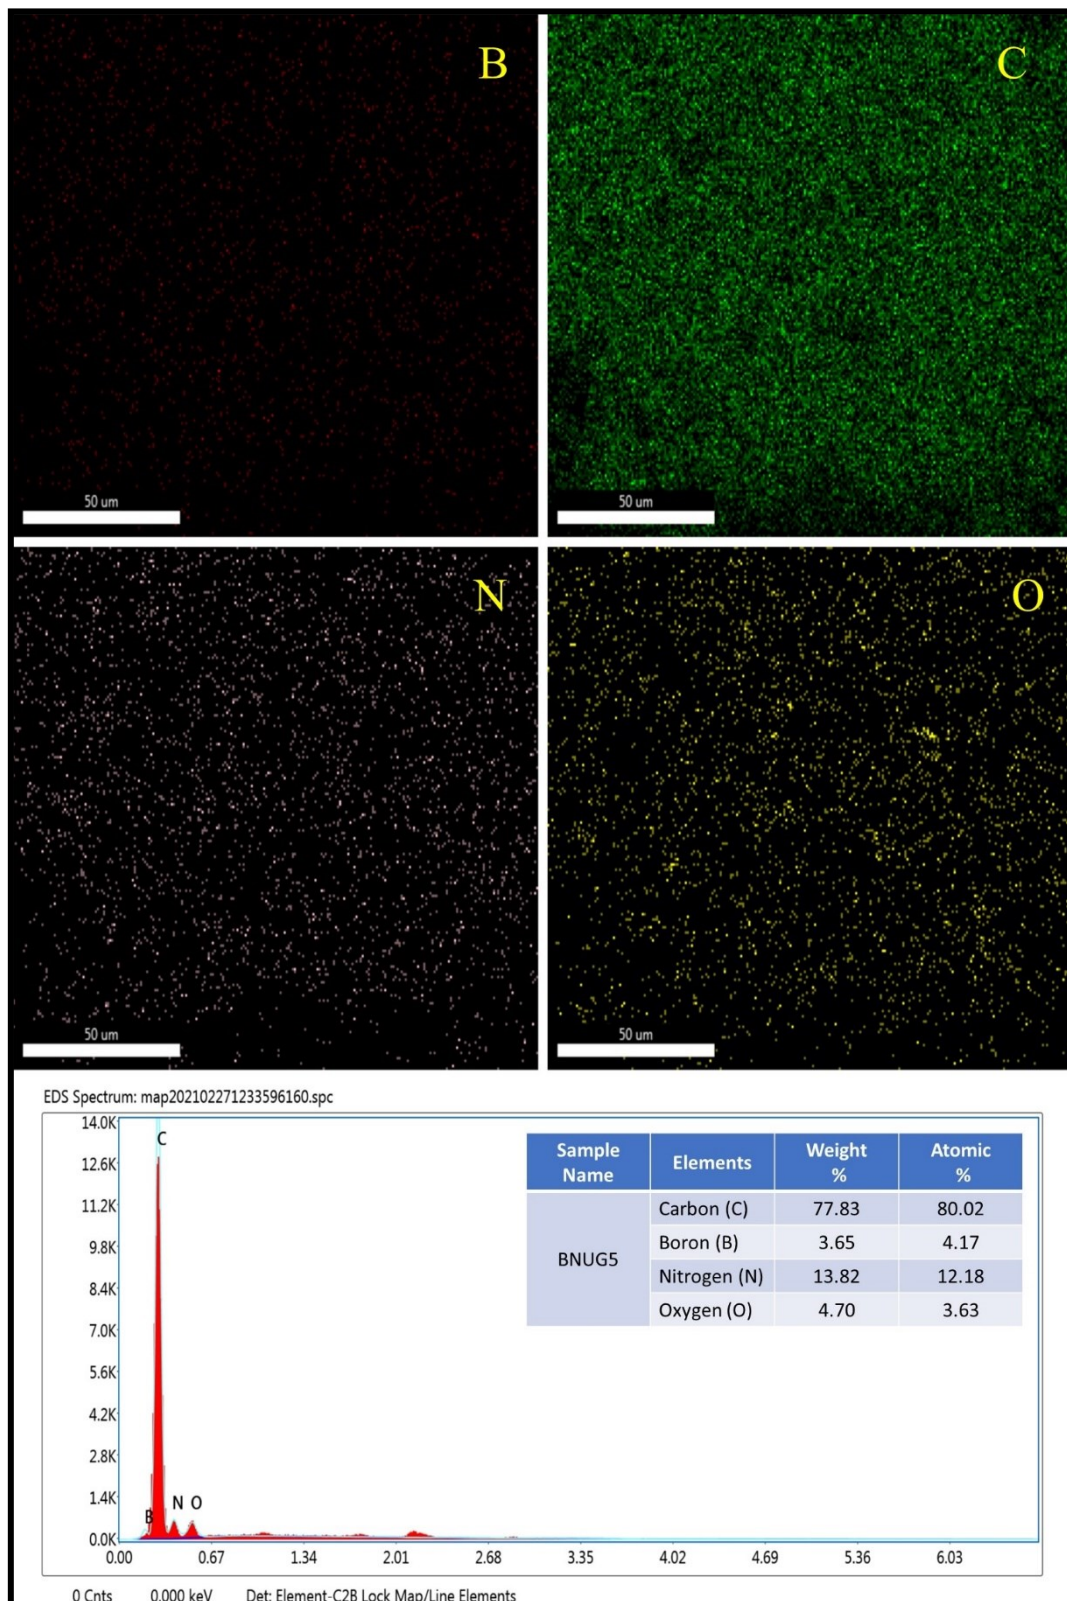

**Figure S7.** Deconvoluted XPS spectra of O1s (a) BNUG2, (b) BNUG3 and (c) BNUG4

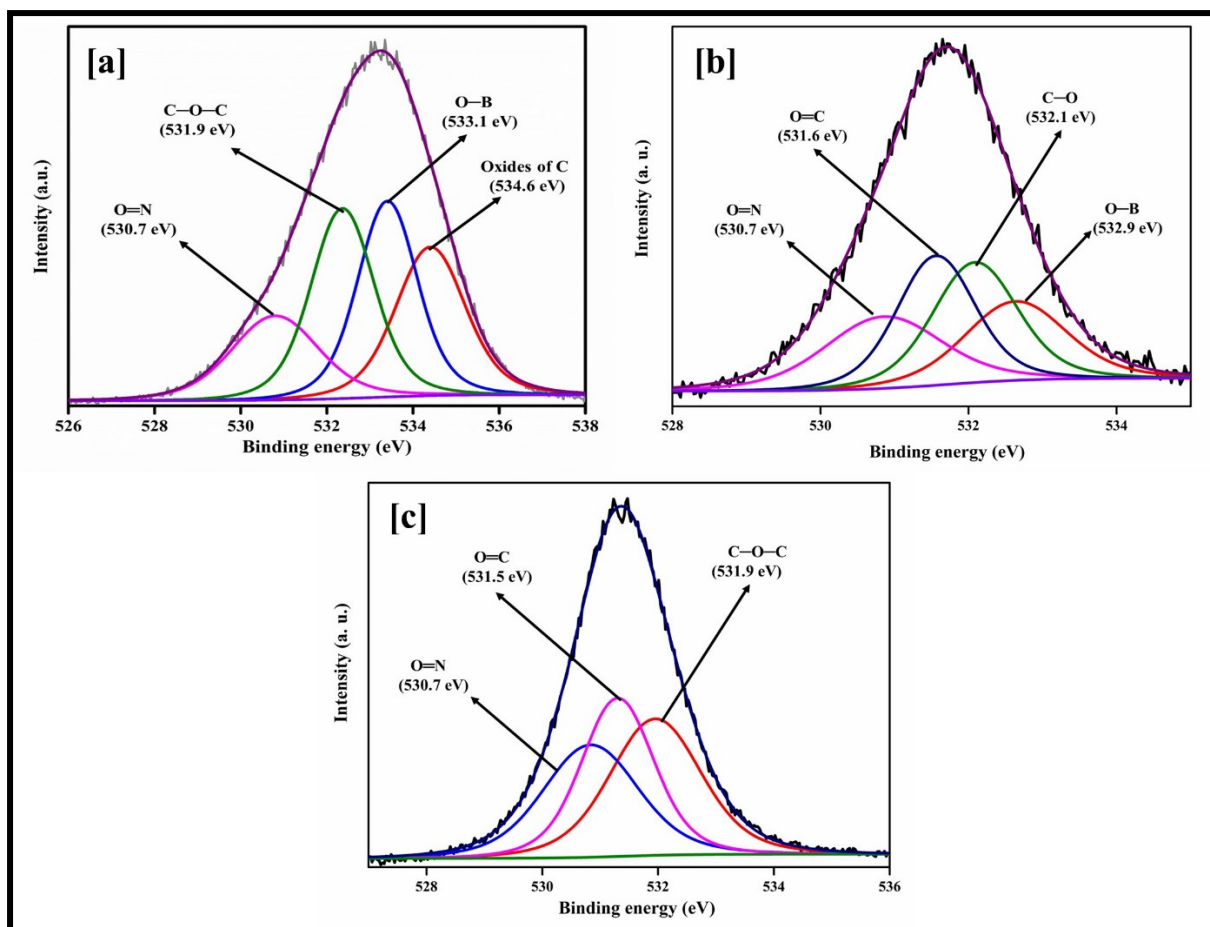

**Figure S8.** (a, c) Cyclic voltammetry at various scan rate of 100  $\text{mV s}^{-1}$  to 10  $\text{mV s}^{-1}$  and (b, d) Charge-Discharge curve at various current density from 1  $\text{Ag}^{-1}$  to 20  $\text{Ag}^{-1}$  of BNUG1 and BNUG2

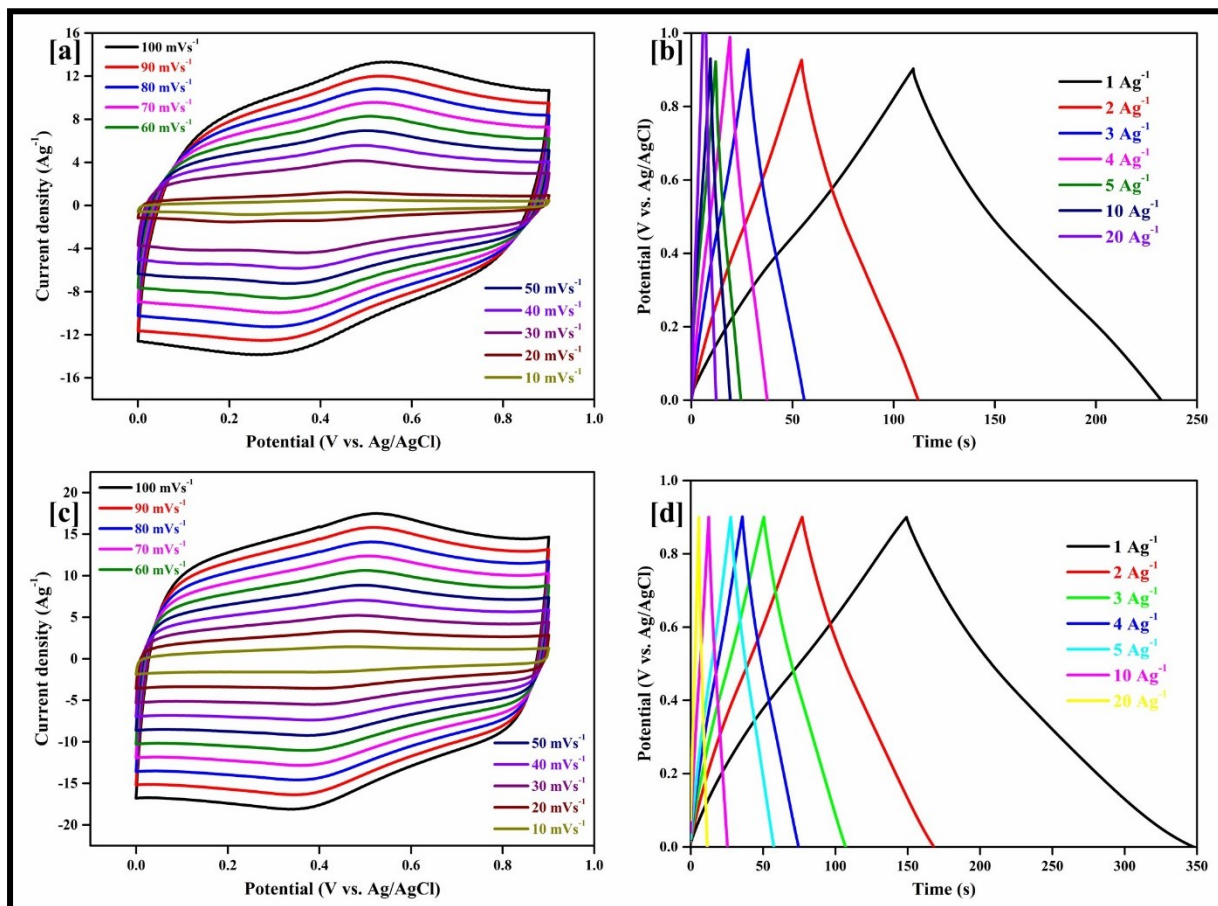



**Figure S9.** (a, c) Cyclic voltammetry at various scan rate of 100 mV s<sup>-1</sup> to 10 mV s<sup>-1</sup> and (b, d) Charge-Discharge curve at various current density from 1 Ag<sup>-1</sup> to 20 Ag<sup>-1</sup> of BNUG3 and BNUG5

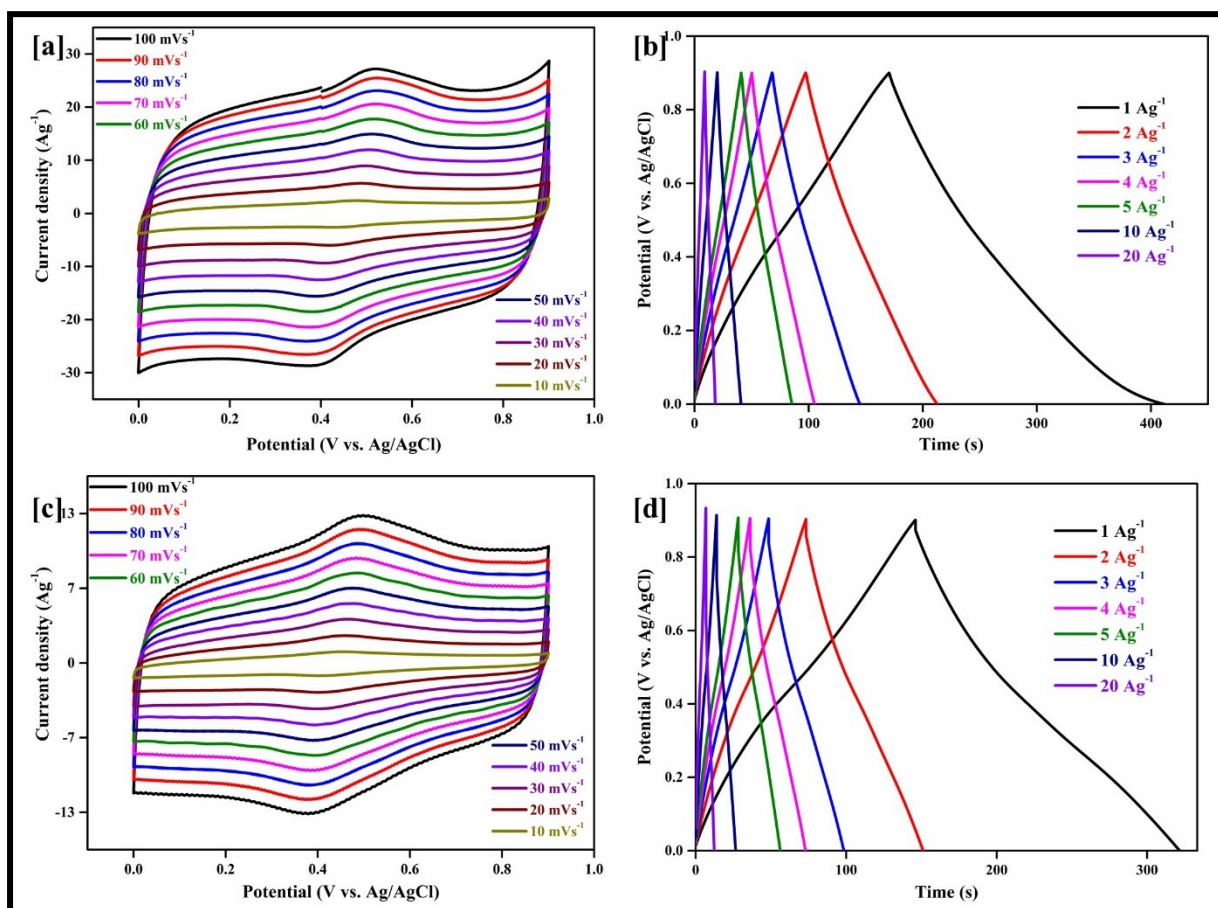

**Figure S10.** (a, c, e) Cyclic voltammetry at various scan rate of 100 mV s<sup>-1</sup> to 10 mV s<sup>-1</sup> and (b, d, f) Charge-Discharge curve at various current density from 1 Ag<sup>-1</sup> to 20 Ag<sup>-1</sup> of GO, BGO and NGO

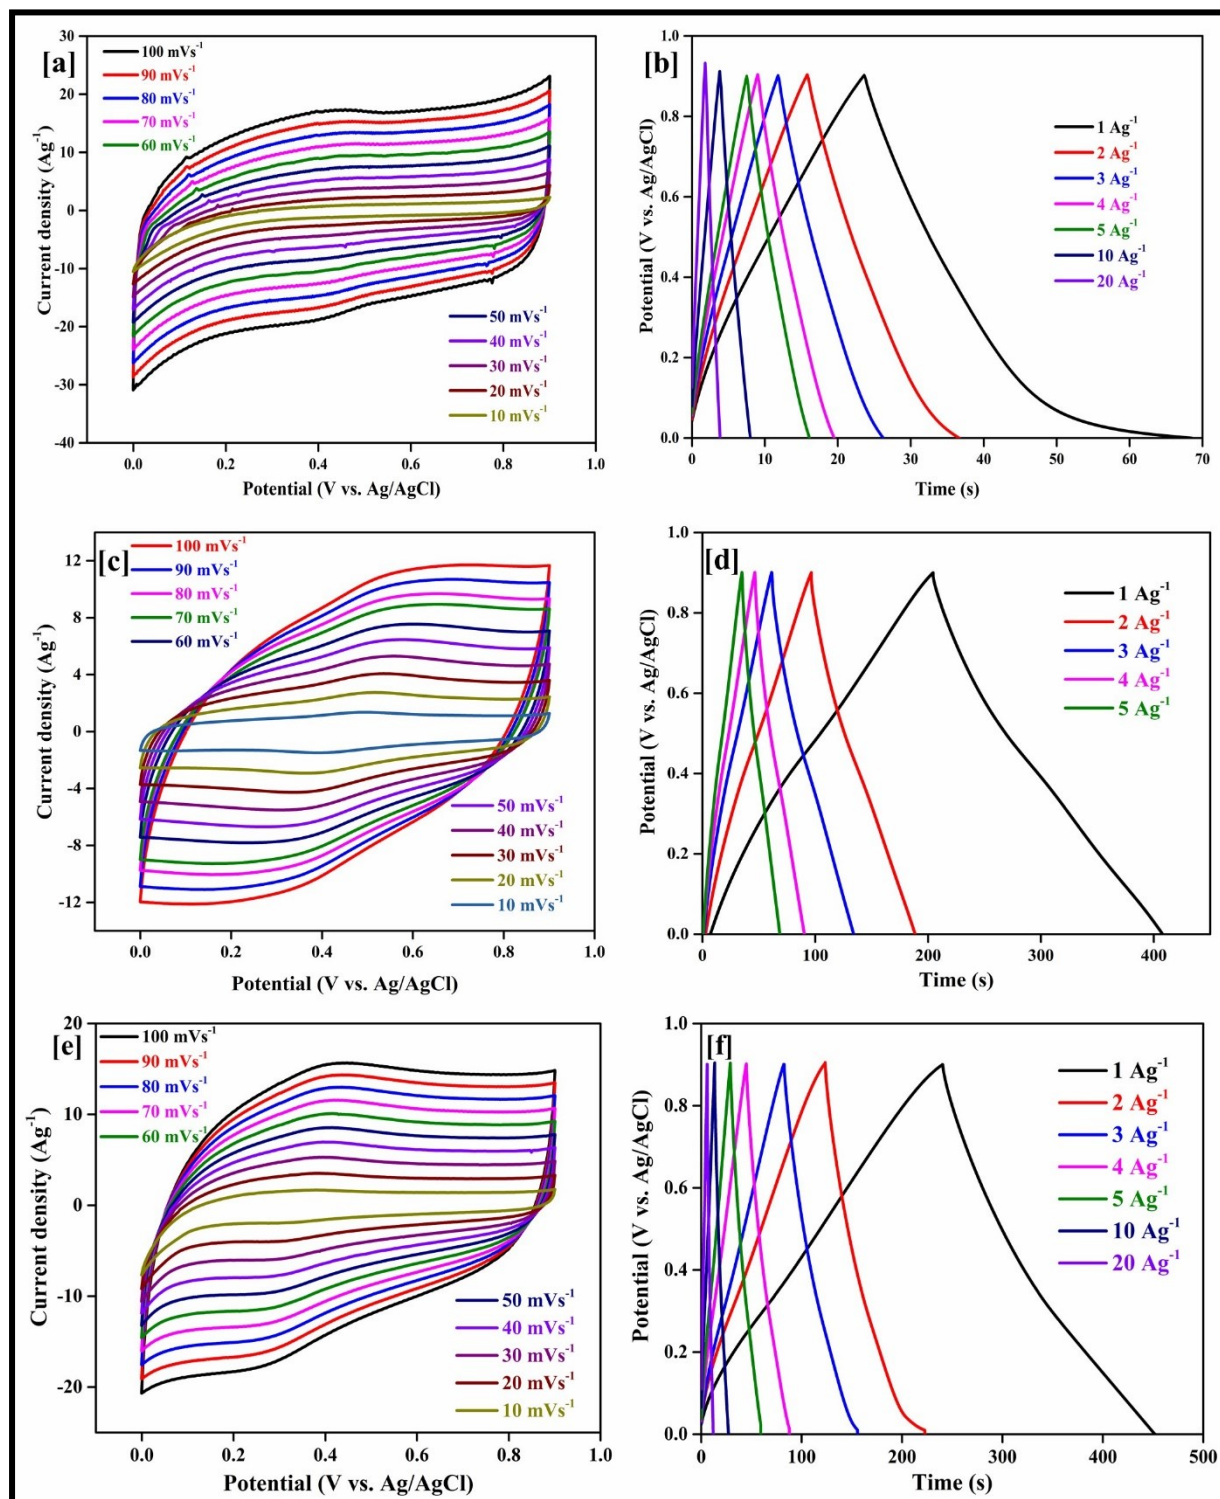

Figure S11. (a, c) Cyclic voltammetry curve of BNUG6 and BNUG7 at various scan rate from 100 to 10  $\text{mVs}^{-1}$ , (b, d) Charge-discharge curve of BNUG6 and BNUG7 at different current densities from 1 to 10  $\text{Ag}^{-1}$ .

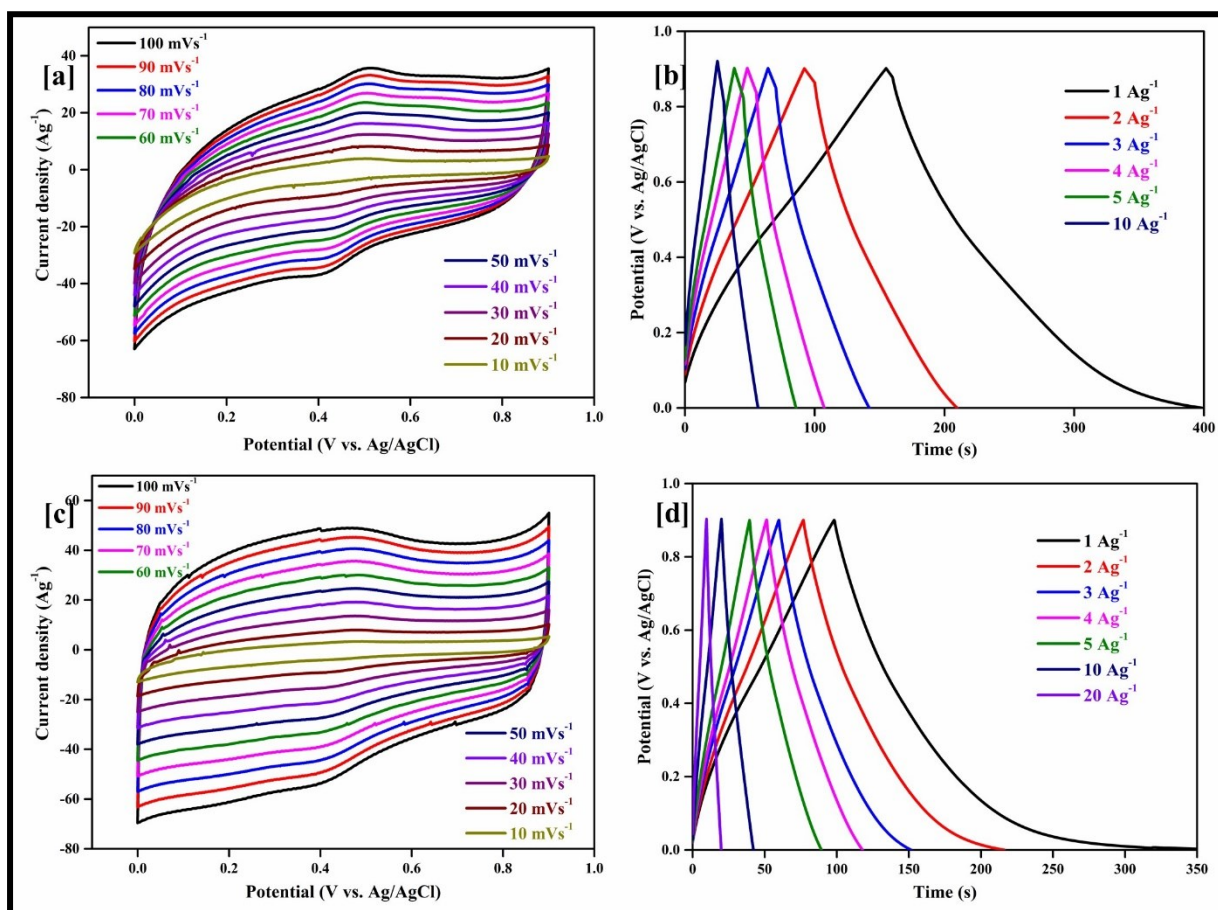

**Figure S 12.** (a) Cyclic Voltammetry curve of activated charcoal at different scan rate and (b) Charge-discharge curve of activated charcoal at different current densities from  $0.5 \text{ Ag}^{-1}$  to  $10 \text{ Ag}^{-1}$ .

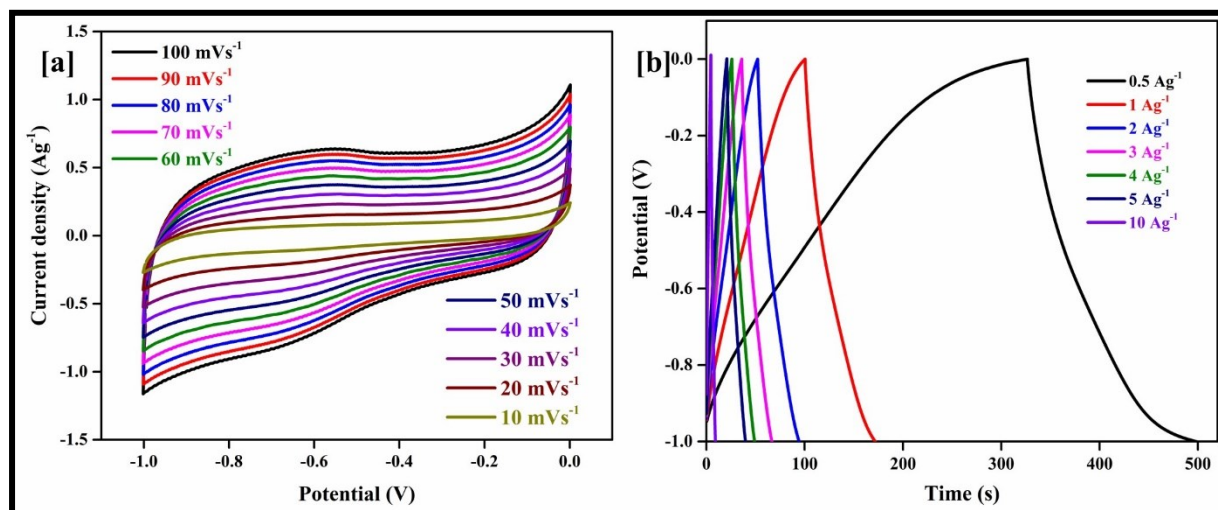

**Figure S13.** (a, c, e) Cyclic voltammetry curve at various scan rate from  $100 \text{ mV s}^{-1}$  to  $10 \text{ mV s}^{-1}$  and (b, d, f) Charge-Discharge curve at various current density from  $1 \text{ Ag}^{-1}$  to  $5 \text{ Ag}^{-1}$  of an ASSC device of BNUG4//AC at an operating potential window of 1.0 V, 1.2 V and 1.4 V

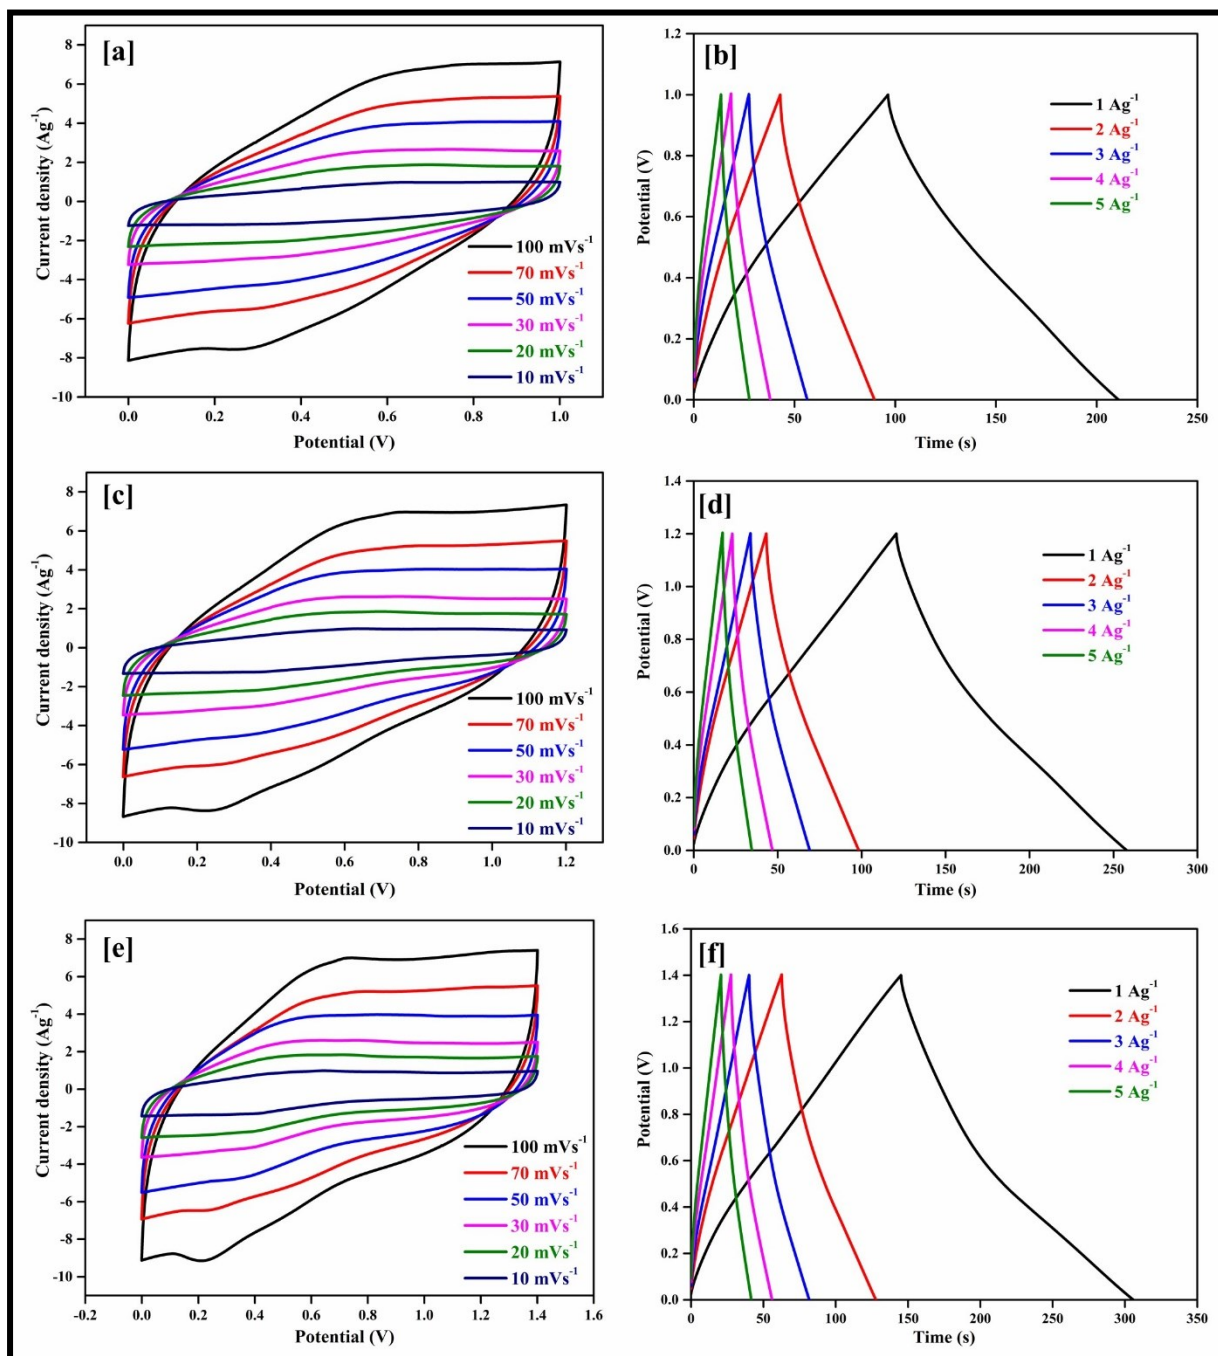

**Figure S14.** (a, c, e) Cyclic voltammetry curve at various scan rate from  $100 \text{ mV s}^{-1}$  to  $10 \text{ mV s}^{-1}$  and (b, d, f) Charge-Discharge curve at various current density from  $1 \text{ Ag}^{-1}$  to  $5 \text{ Ag}^{-1}$  of an ASSC device of BNUG4//AC at an operating potential window of  $1.6 \text{ V}$ ,  $1.8 \text{ V}$  and  $2.0 \text{ V}$

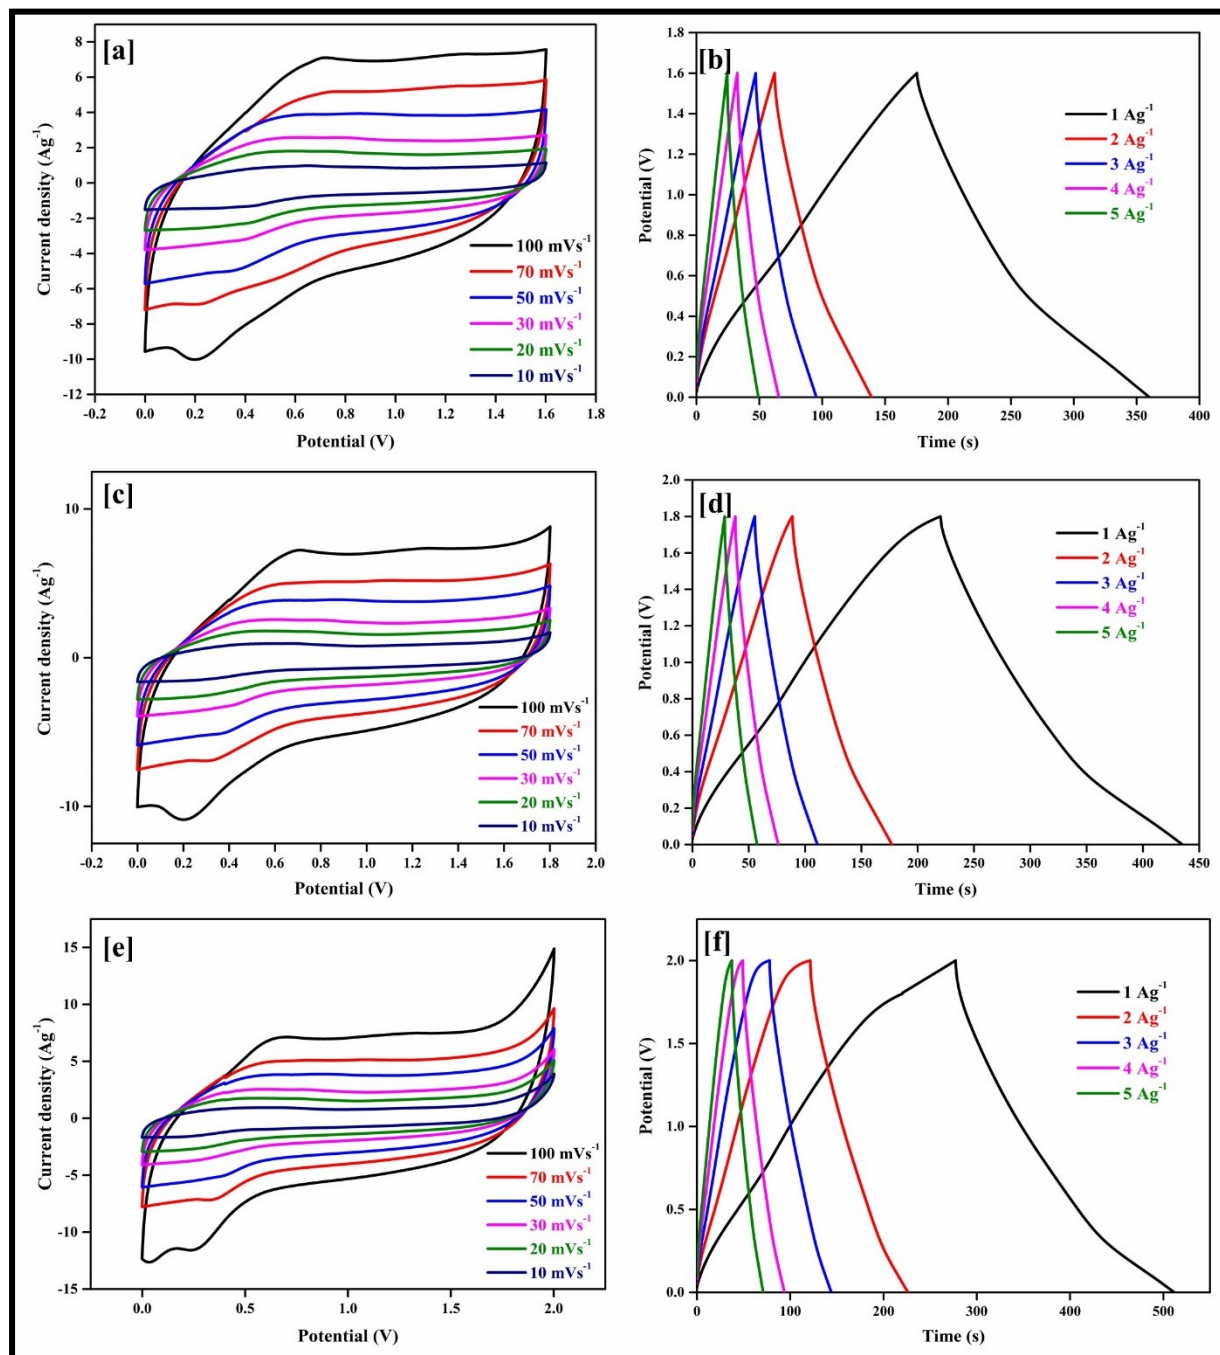

**Figure S15.** (a, c) Cyclic voltammetry curve at various scan rate from  $100 \text{ mVs}^{-1}$  to  $10 \text{ mVs}^{-1}$  and (b, d) Charge-Discharge curve at various current density of  $1 \text{ Ag}^{-1}$  to  $5 \text{ Ag}^{-1}$  of BNUG4//BNUG4 at  $1.8 \text{ V}$  before and after cyclic stability

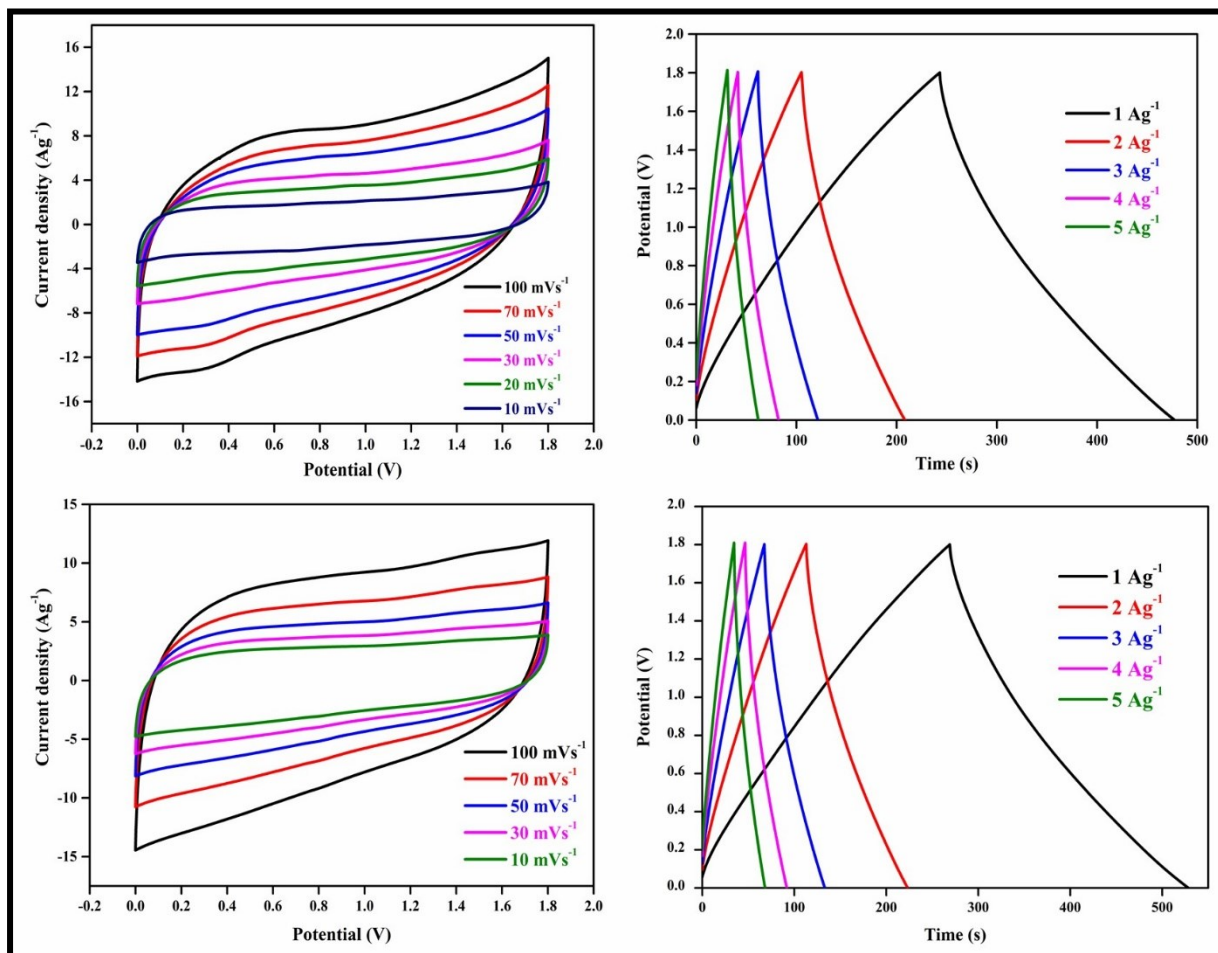

**Figure S16.** (a, c) Cyclic voltammetry curve at various scan rate from  $100 \text{ mVs}^{-1}$  to  $10 \text{ mVs}^{-1}$  and (b, d) Charge-Discharge curve at various current density of  $1 \text{ Ag}^{-1}$  to  $5 \text{ Ag}^{-1}$  of BNUG4//BNUG4 at 1.6 V before and after cyclic stability

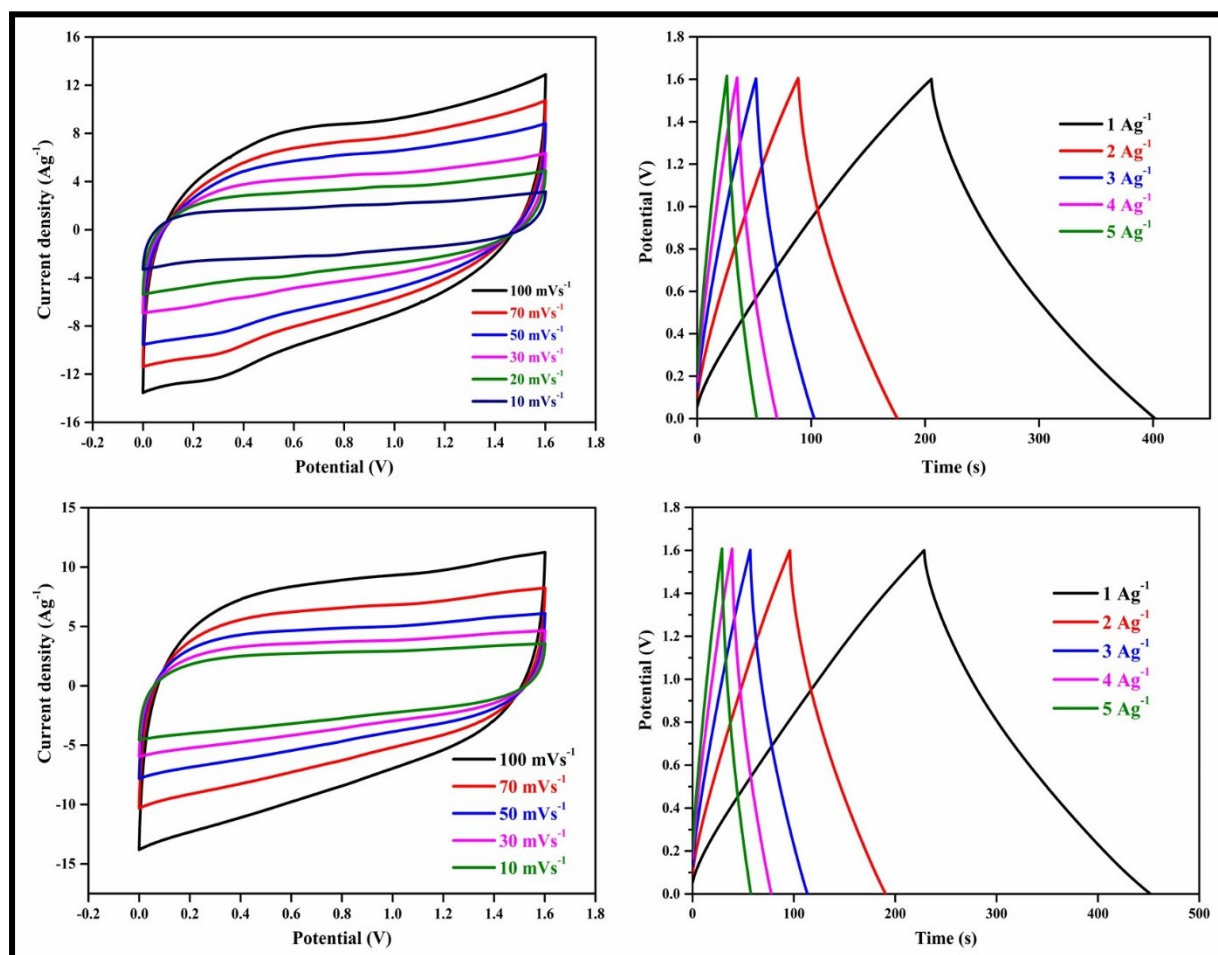



**Figure S17.** (a, c) Cyclic voltammetry curve at various scan rate from  $100 \text{ mVs}^{-1}$  to  $10 \text{ mVs}^{-1}$  and (b, d) Charge-Discharge curve at various current density of  $1 \text{ Ag}^{-1}$  to  $5 \text{ Ag}^{-1}$  of BNUG4//BNUG4 at  $1.4 \text{ V}$  before and after cyclic stability

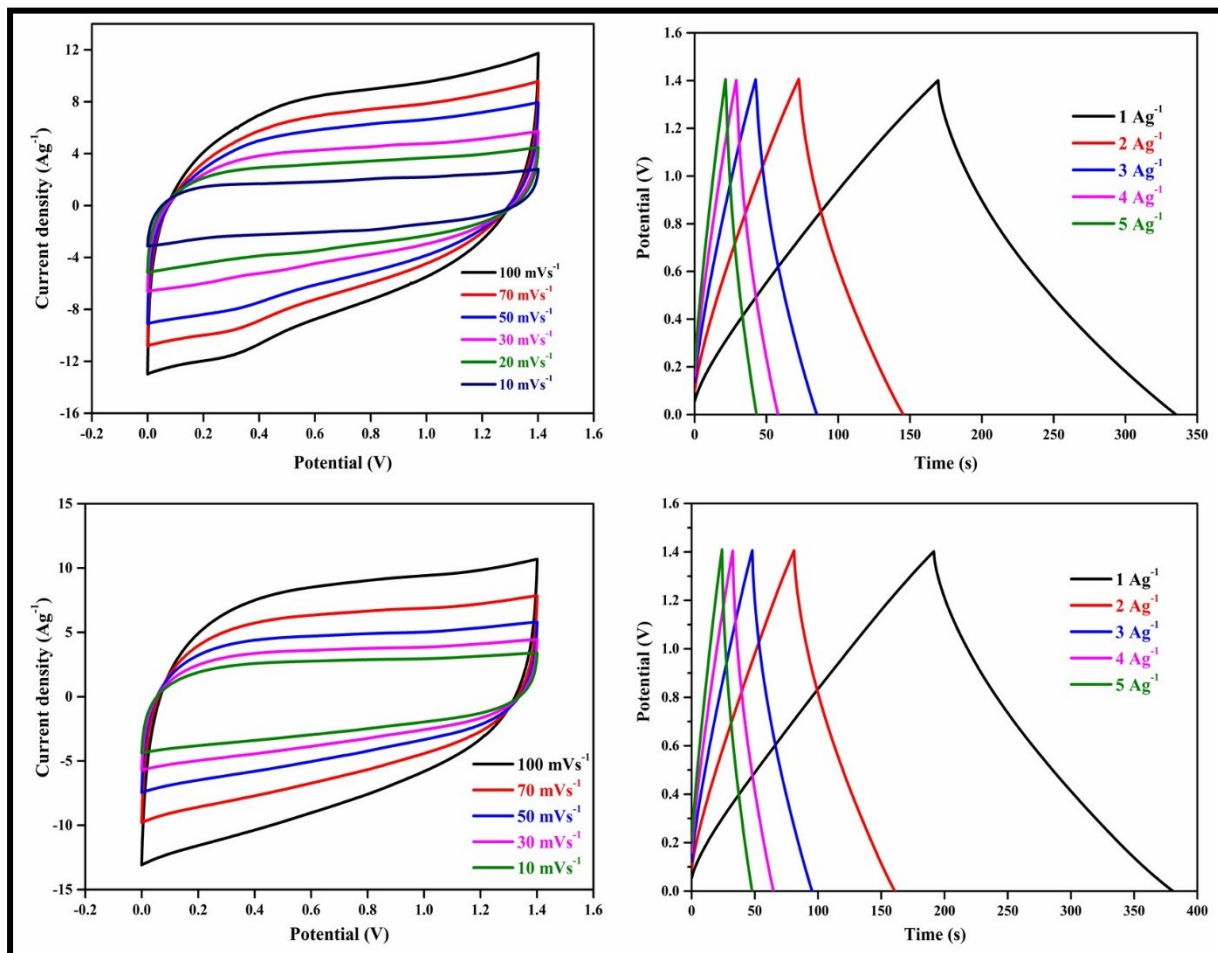

**Figure S18.** (a, c) Cyclic voltammetry curve at various scan rate from  $100 \text{ mVs}^{-1}$  to  $10 \text{ mVs}^{-1}$  and (b, d) Charge-Discharge curve at various current density of  $1 \text{ Ag}^{-1}$  to  $5 \text{ Ag}^{-1}$  of BNUG4//BNUG4 at  $1.2 \text{ V}$  before and after cyclic stability

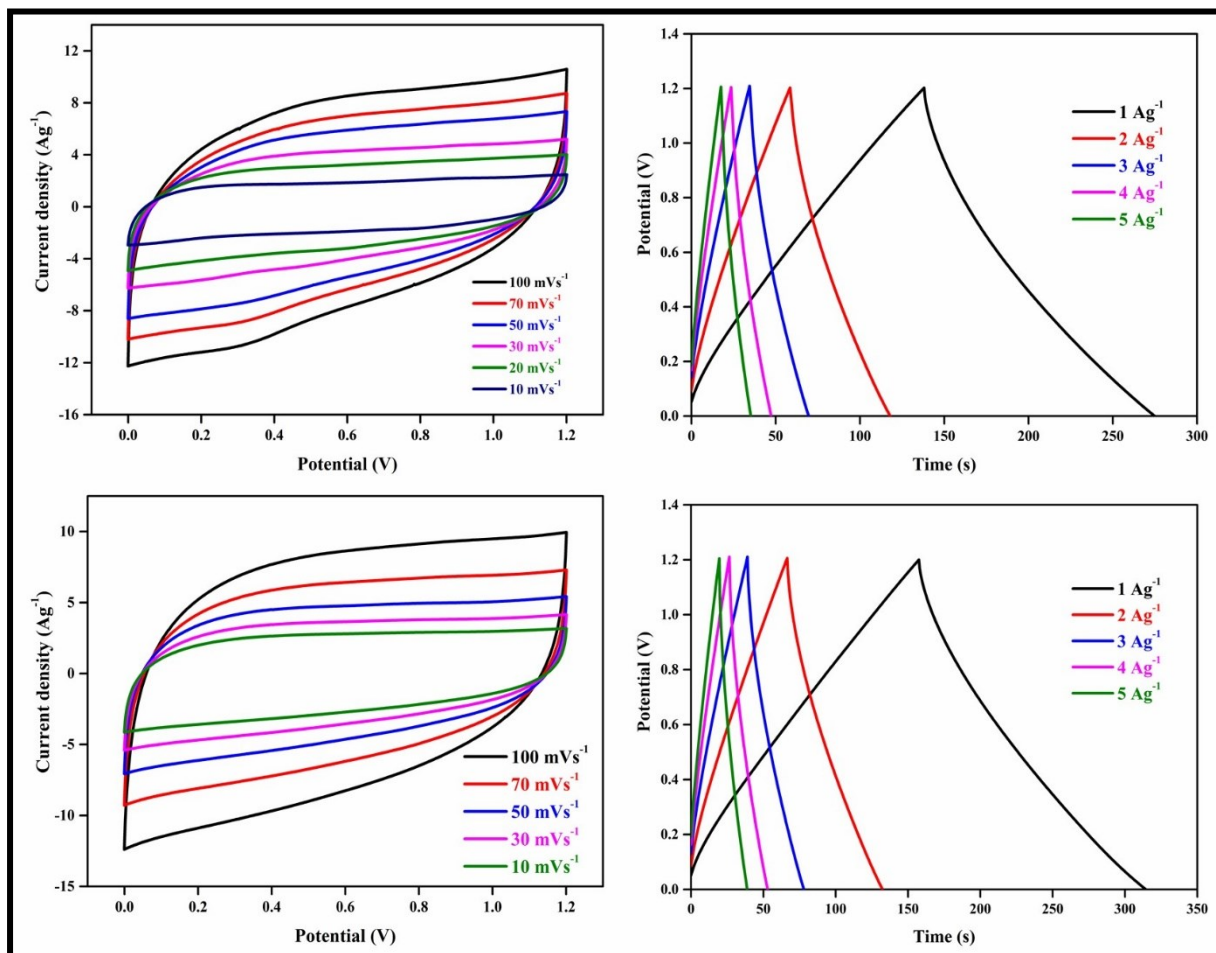

**Figure S19.** (a, c) Cyclic voltammetry curve at various scan rate from  $100 \text{ mVs}^{-1}$  to  $10 \text{ mVs}^{-1}$  and (b, d) Charge-Discharge curve at various current density of  $1 \text{ Ag}^{-1}$  to  $5 \text{ Ag}^{-1}$  of BNUG4//BNUG4 at  $1.0 \text{ V}$  before and after cyclic stability

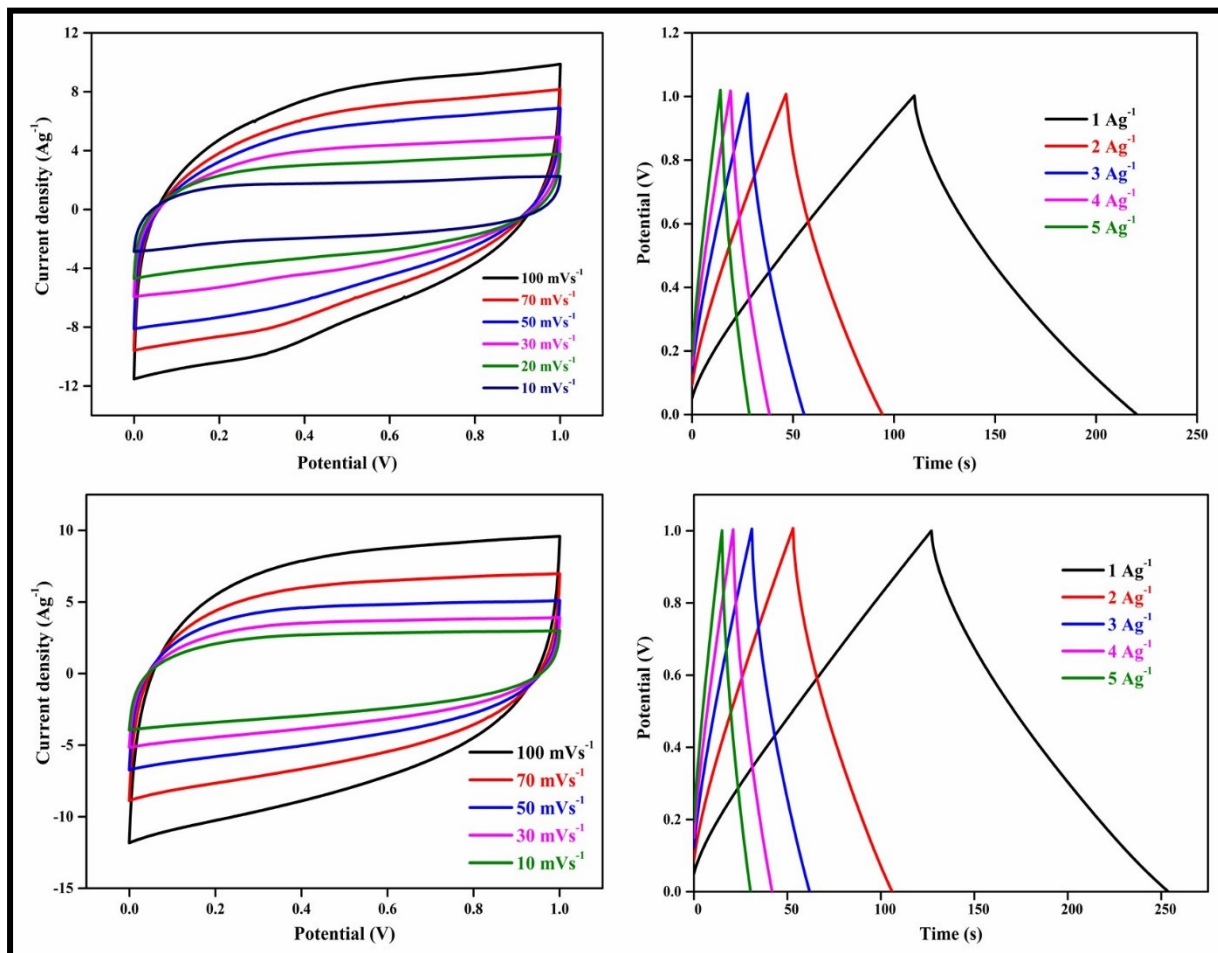

Supplement: d1nj00486g1.pdf [file d1nj00486g1.pdf]
